# Supplementary material for: Dissection of the amyloid formation pathway in AL amyloidosis
Source: Springer Nature journal article supplement (doi:10.1038/s41467-021-26845-0), 2021-11-11
Supplement: MOESM1 [file 41467_2021_26845_MOESM1_ESM.pdf]

## Supplementary information

### Dissection of the amyloid formation pathway in AL amyloidosis

Pamina Kazman<sup>1,#</sup>, Ramona M Absmeier<sup>1,#</sup>, Harald Engelhardt<sup>2</sup>, Johannes Buchner<sup>1\*</sup>

<sup>1</sup> *Department Chemie, Technische Universität München, 85748 Garching, Germany*

<sup>2</sup> *Department Molecular Structural Biology, Max-Planck-Institute of Biochemistry, 82152*

*Martinsried, Germany*

*# contributed equally*

\* corresponding author: [johannes.buchner@tum.de](mailto:johannes.buchner@tum.de)

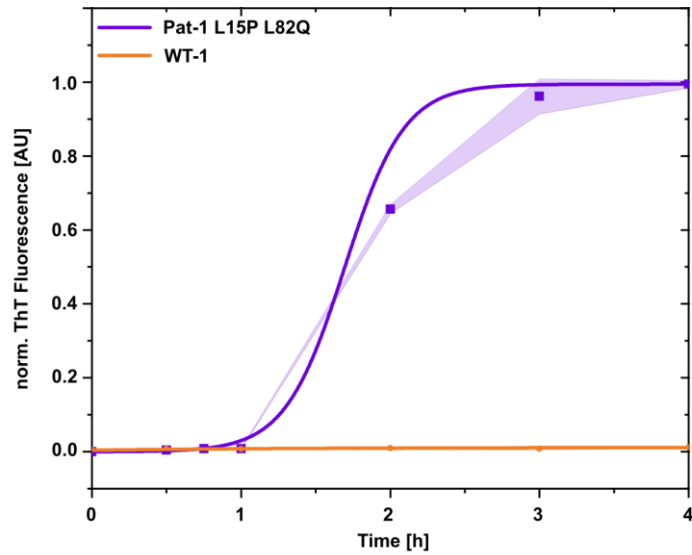

**Supplementary Figure 1. Fibril formation of Pat-1 L15P L82Q (violet) and the germline WT-1 (orange).** Shades represent the SEM of n=3.

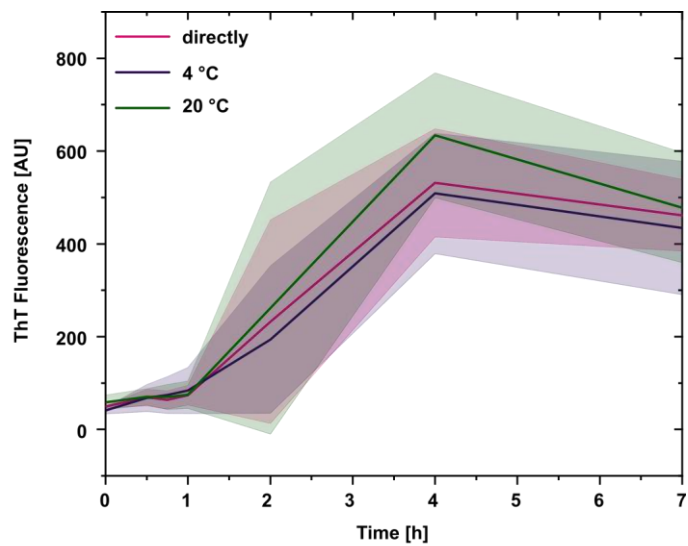

**Supplementary Figure 2. Fibril formation stop.** The inhibition of further fibril formation when shaking was monitored by ThT fluorescence when directly measuring the samples after stop shaking and measuring them after leaving them at either 4 °C or 20 °C for 3 hours. Shades represent the SEM of n=3.

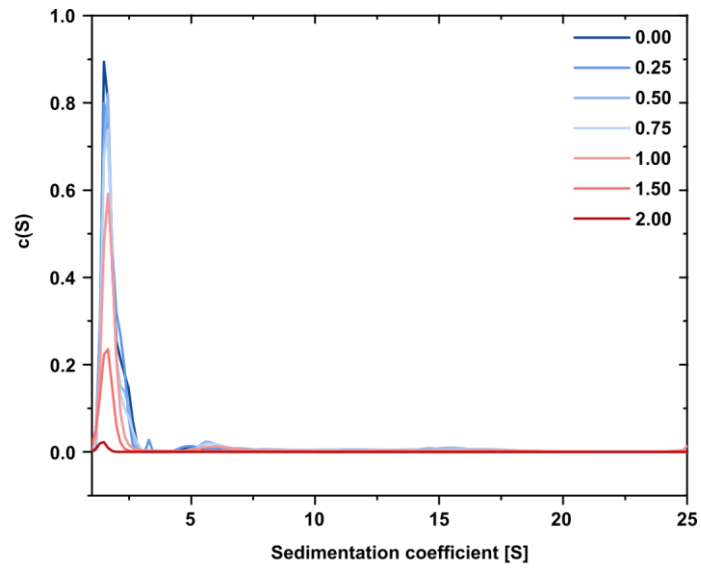

**Supplementary Figure 3. Full sedimentation profile of oligomeric species present in the lag phase.** AUC data show the sedimentation profiles over time as analyzed by the Sedfit software.

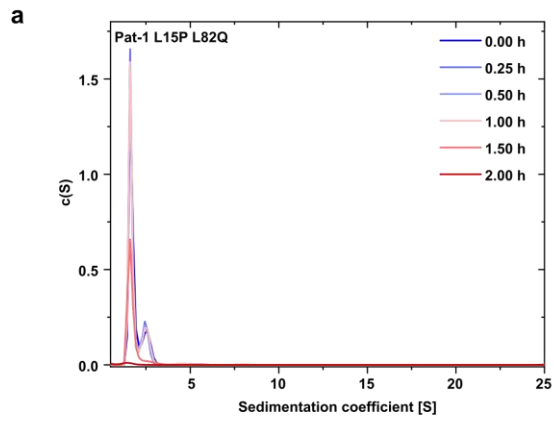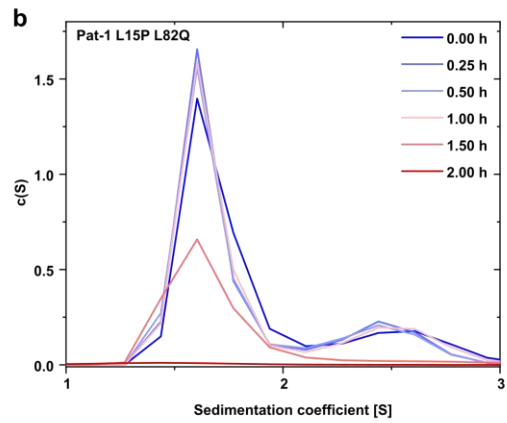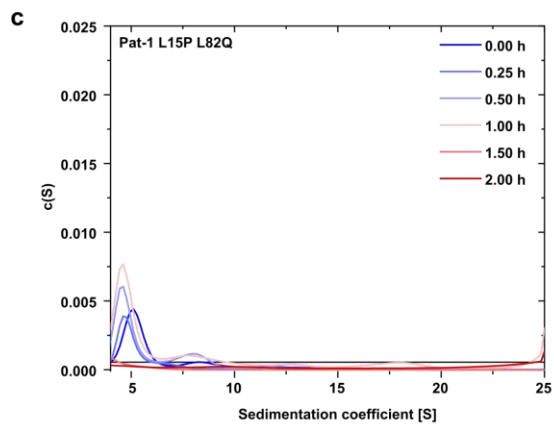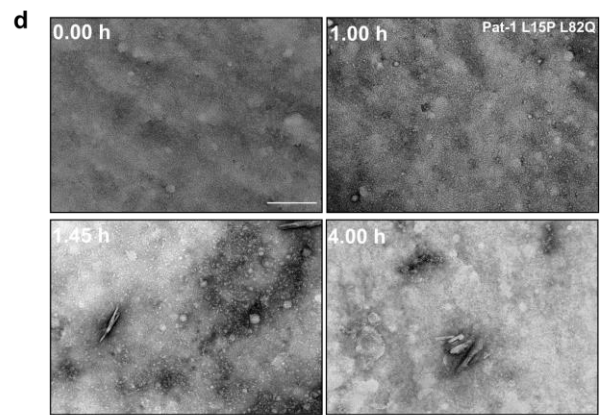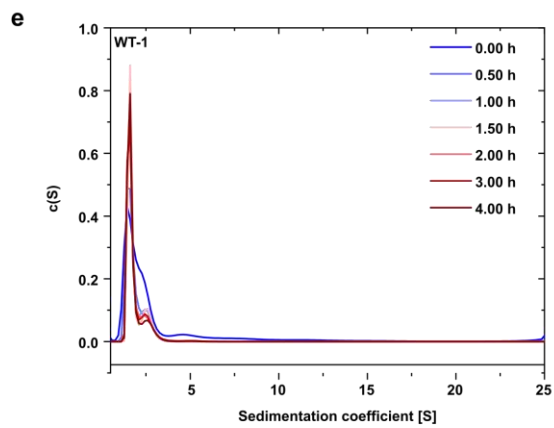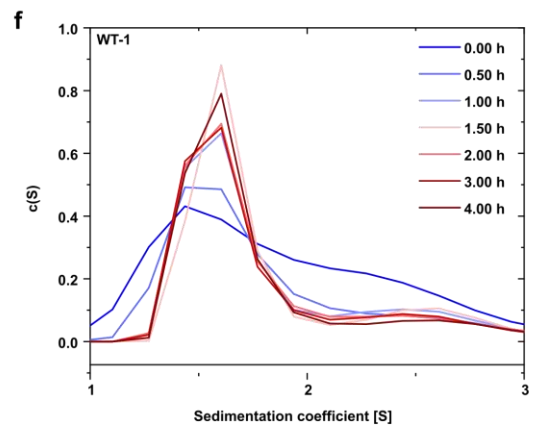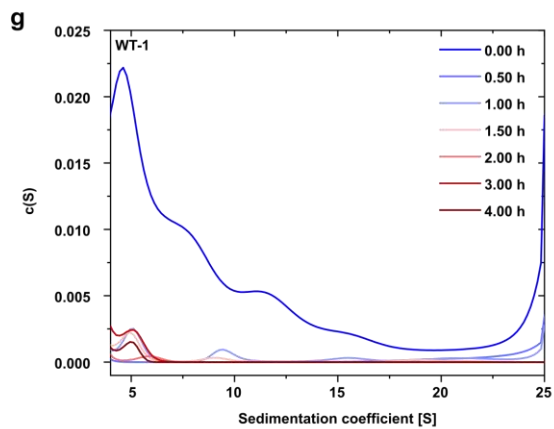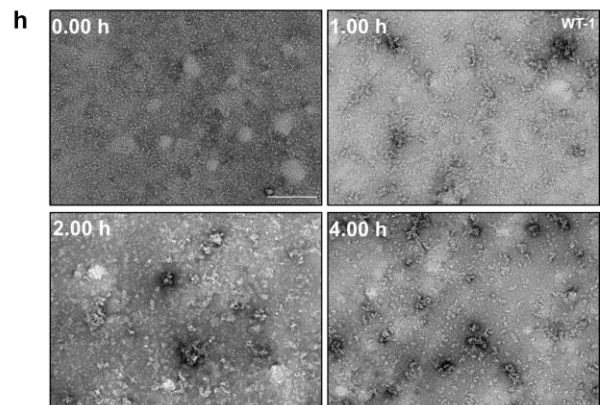

**Supplementary Figure 4. Analysis of oligomeric species of the Pat-1 mutant L15P L82Q and the germline WT-1.** a) Full sedimentation profile of the lag phase of Pat-1 L15P L82Q analyzed by the Sedfit software b) monomer peak of the sedimentation profile of Pat-1 L15P L82Q c) oligomer peaks of the sedimentation profile of Pat-1 L15P L82Q d) TEM micrographs of the oligomeric and fibril species of Pat-1 L15P L82Q during the lag phase. e) Full sedimentation profile of the Lag phase of WT-1 analyzed by the Sedfit software f) monomer peak of the sedimentation profile of WT-1 g) oligomer peaks of the sedimentation profile of WT-1 h) TEM micrographs of the oligomeric species of WT-1 during the lag phase. Scale bars represent 200 nm.

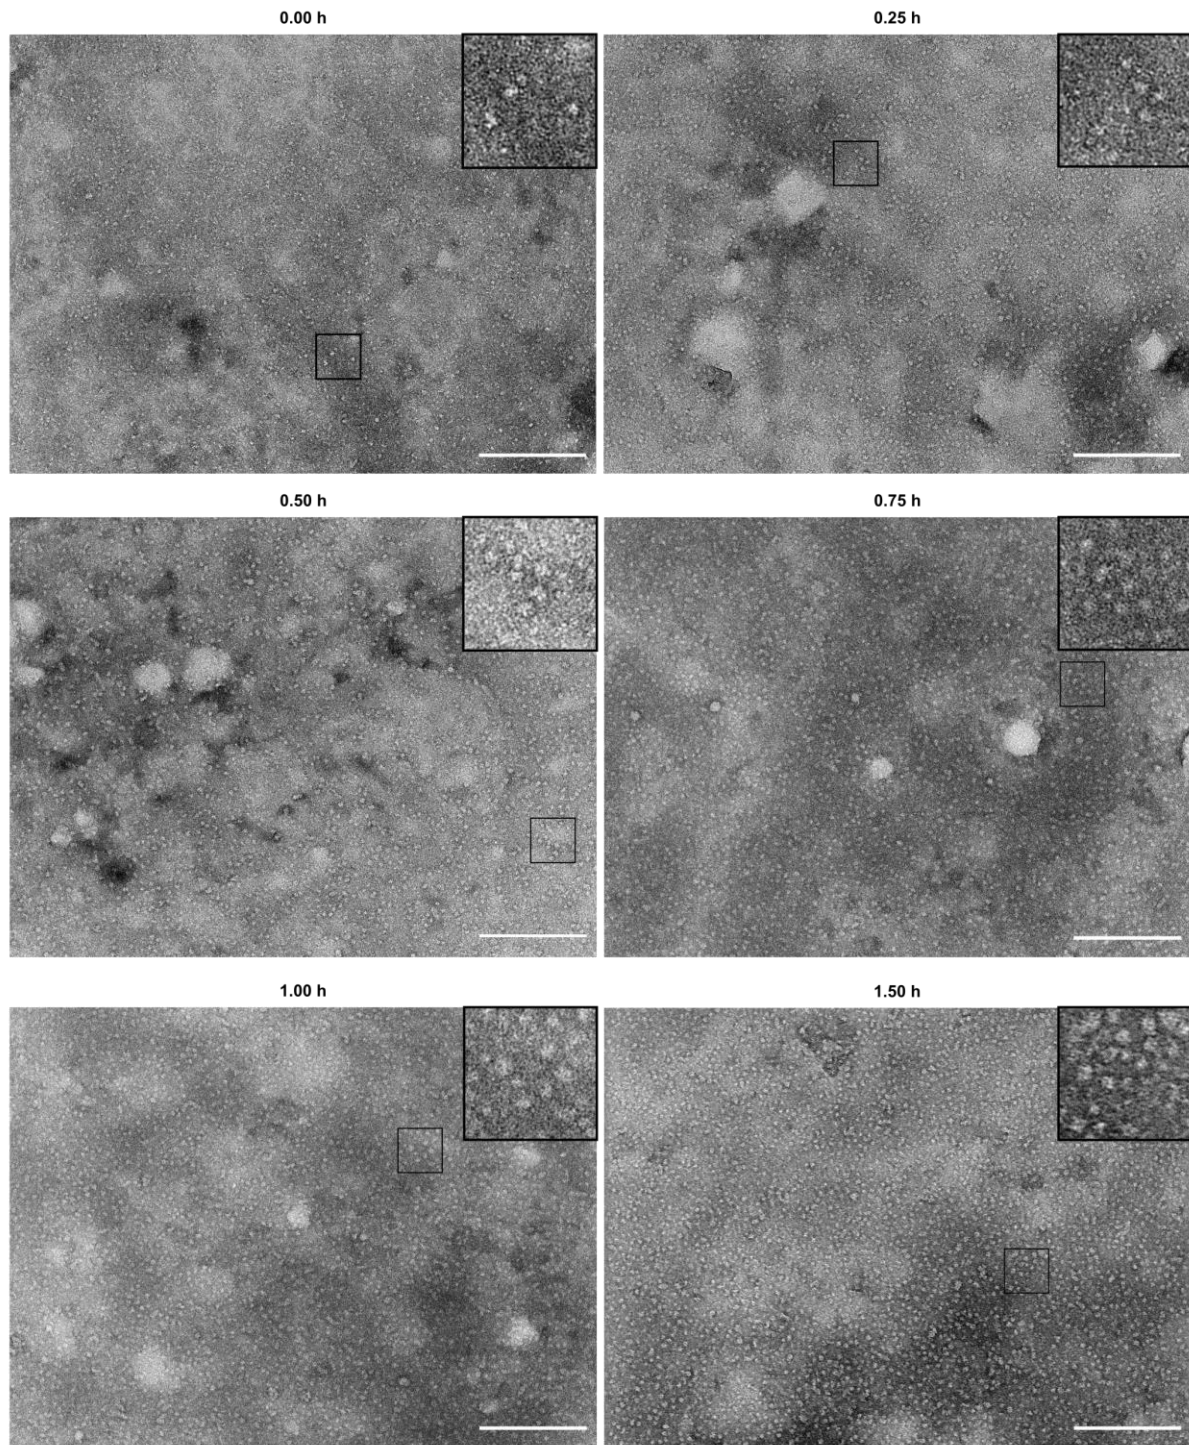

**Supplementary Figure 5. TEM micrographs of oligomers at different time points during the lag phase.** Area of black outlined squares is shown in 30x magnification. The scale bars represent 200 nm.

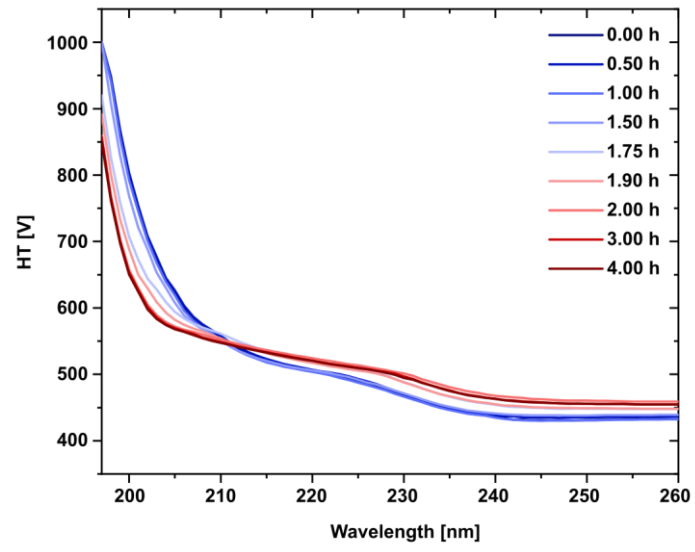

Supplementary Figure 6. HT signal of the CD spectrum of Pat-1 V<sub>L</sub>.

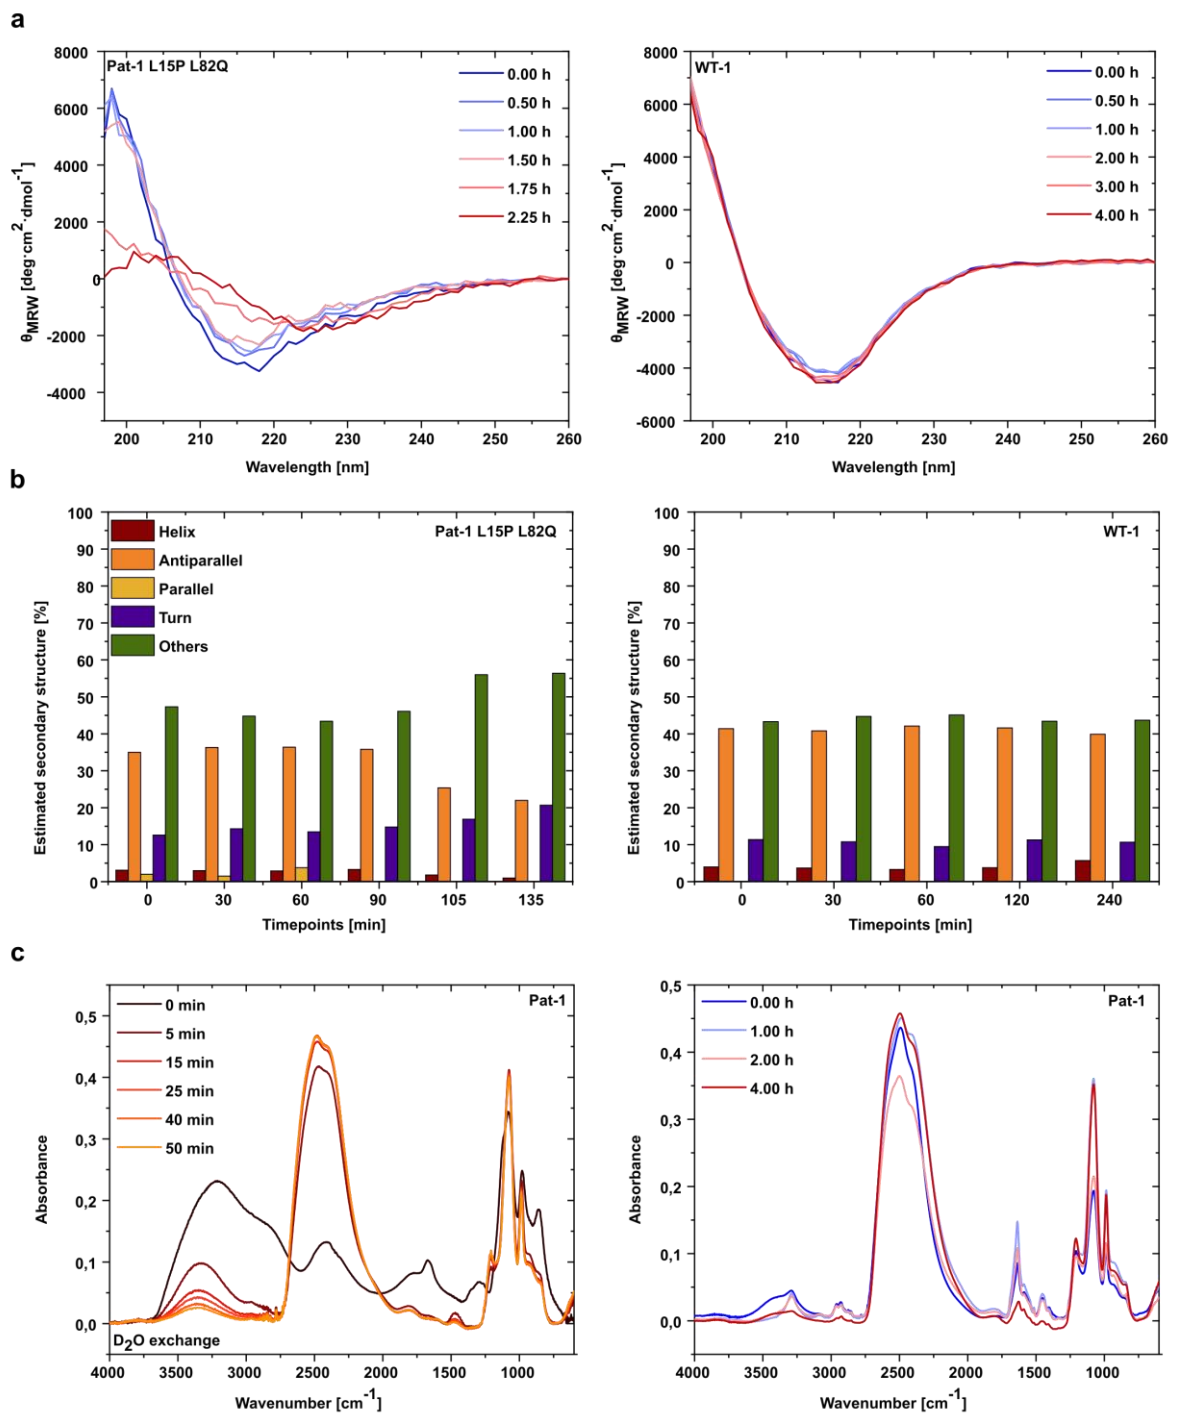

**Supplementary Figure 7. Secondary structure analysis of Pat-1, WT-1 and Pat-1 L15P L82Q.** a) CD spectra of different lag phase time points until fibrils formation of the double mutant L15P L82Q (left panel), and CD spectra of the germline WT-1 (right panel). b) Secondary structure analysis of the CD spectra of Pat-1, its double mutant and the germline with the BeStSel algorithm. c) ATR-FTIR analysis of Pat-1. The left panel shows the success of the D<sub>2</sub>O exchange of the buffer background which is also representative for the exchange kinetics concerning samples including protein. The right panel shows the FTIR spectra of Pat-1 after 50 minutes of D<sub>2</sub>O exchange.



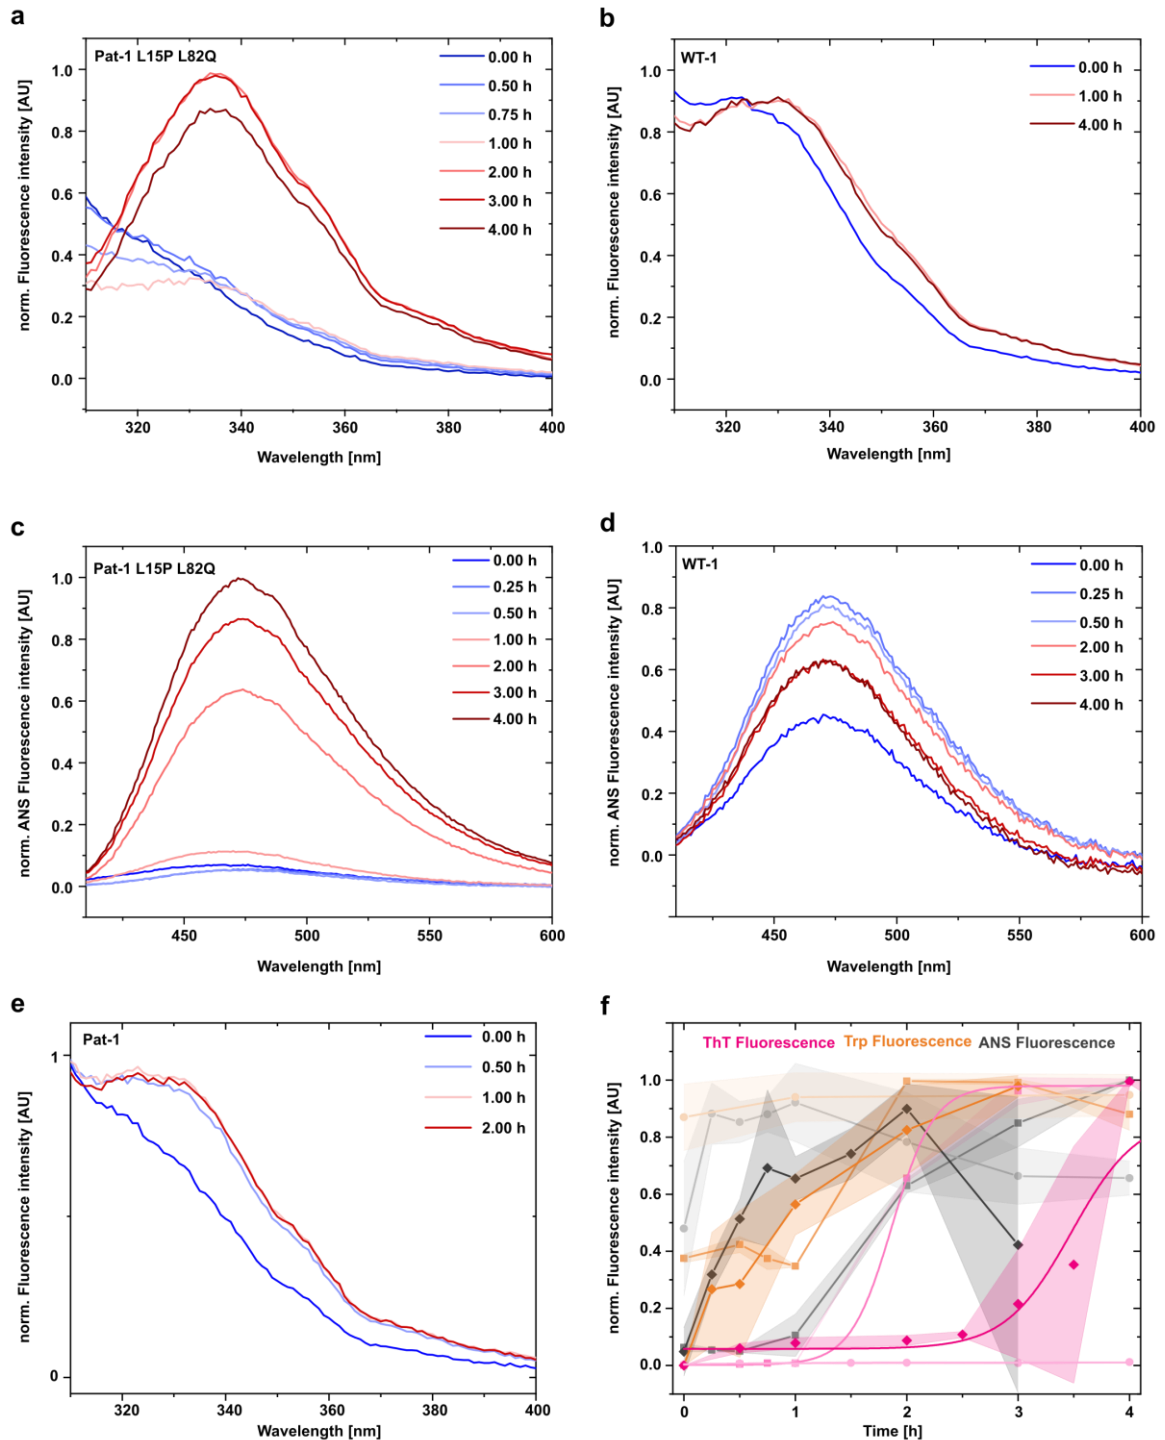

**Supplementary Figure 8. Structural changes during Lag Phase of Pat-1 L15P L82Q and the germline WT-1** a) Trp Fluorescence spectra of Pat-1 L15P L82Q. b) Trp Fluorescence changes of WT-1 during Lag phase. c) Changes of exposed hydrophobicity followed by ANS fluorescence of Pat-1 L15P L82Q. d) Changes of exposed hydrophobicity followed by ANS fluorescence of the germline WT-1. e) Fluorescence intensity changes of Pat-1 during the lag phase measured at 37 °C. f) Summary of the Fluorescence data of all constructs. The different proteins are depicted by a diamond (Pat-1), square (Pat-1 L15P L82Q) or a circle (WT-1). The colors of the symbols correspond to the method as indicated in the graph with different tones of the color used for the different proteins. Shades represent the SEM of n=3.

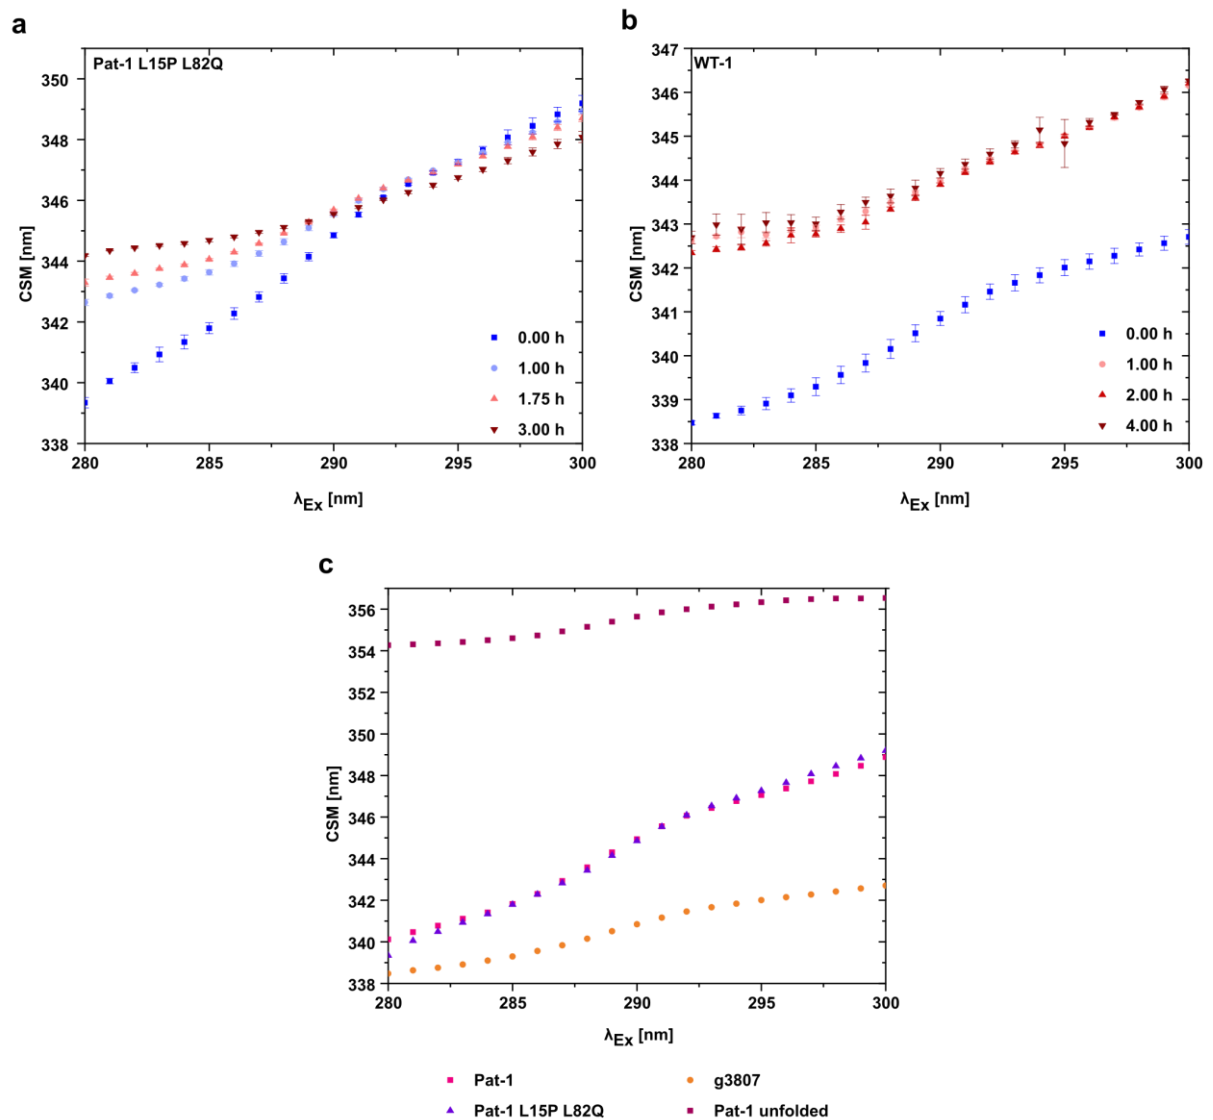

**Supplementary Figure 9. The REES effect of Pat-1 L15P L82Q and WT-1 V<sub>L</sub> during the lag phase.**

a) Change in the CSM for the corresponding excitation wavelengths from 280 to 300 nm of Pat-1 L15P L82Q V<sub>L</sub>. b) Change in the CSM for the corresponding excitation wavelengths from 280 to 300 nm of WT-1 (n=3). c) Comparison of the REES effects of Pat-1, Pat-1 L15P L82Q and WT-1 at 0h. Pat-1 V<sub>L</sub> in 6 M urea is shown as a control for an unfolded protein (n=3). Error bars represent SEM of n=3.

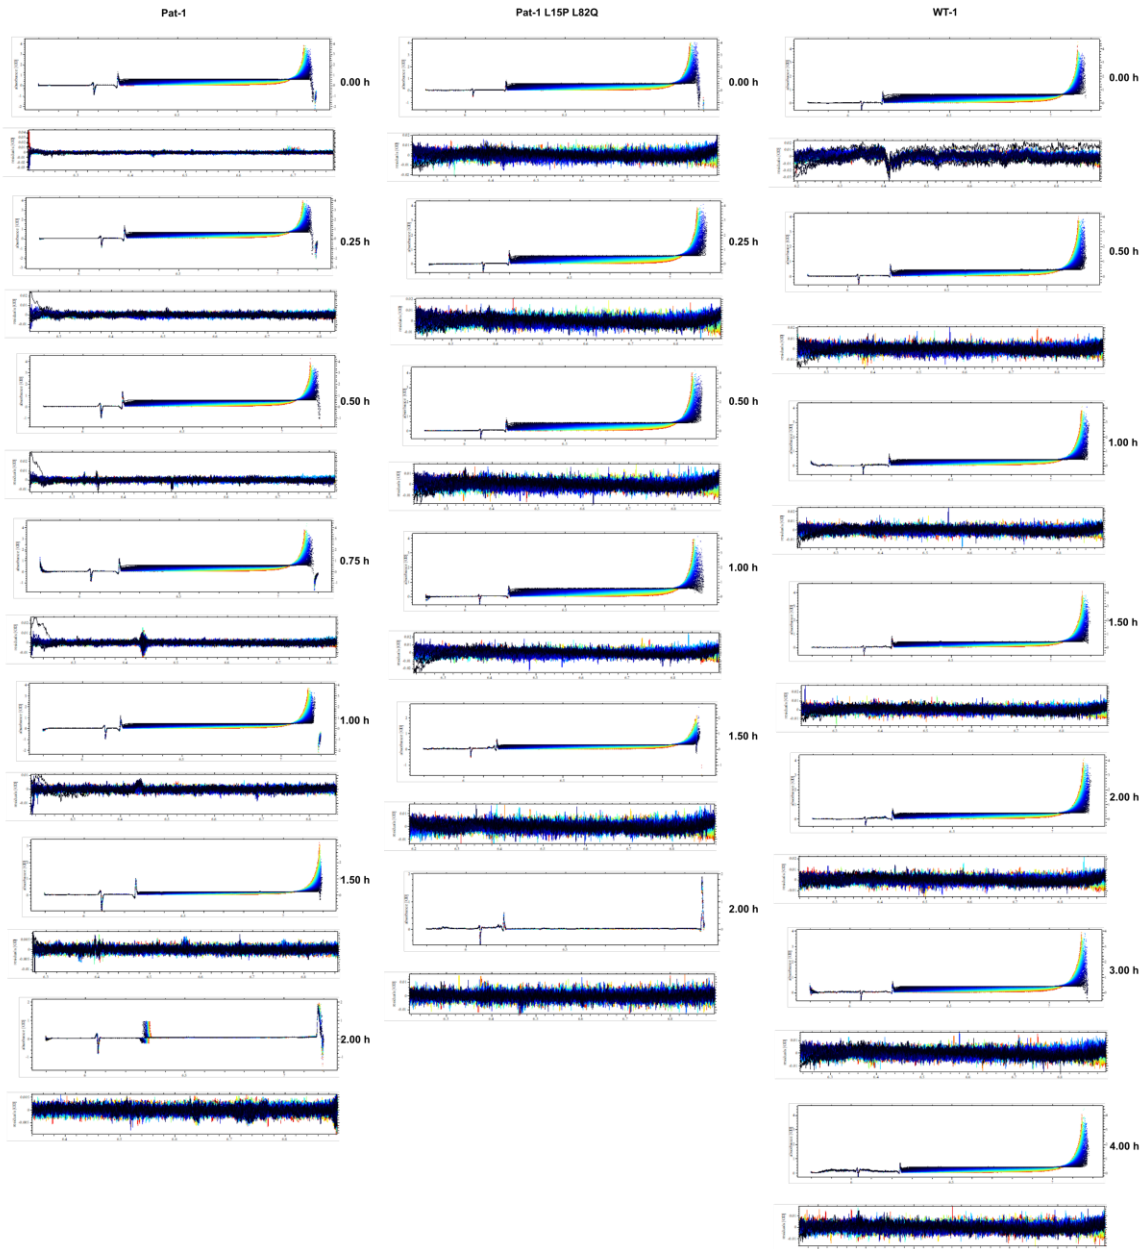

**Supplementary Figure 10. AUC absorbance with residual raw data of Pat-1, Pat-1 L15P L82Q and WT-1.**
